# Supplementary material for: Transcriptional Regulation of RIP2 Gene by NFIB Is Associated with Cellular Immune and Inflammatory Response to APEC Infection
Source: MDPI journal article supplement (doi:10.3390/ijms23073814), 2022-03-30
Supplement: s1 [file s1]

Table S3. Primers for deletion fragments of chicken *RIP2* gene promoter region

| Name           | 5' - 3' primer sequence                    | Product length (bp) |
|----------------|--------------------------------------------|---------------------|
| pGL3-RIP2-P1-F | CGTGCTAGCCCGGGCTCGAGTGAAATGAGCAAATGCAGCCG  | 440                 |
| pGL3-RIP2-P1-R | AACAGTACCGGAATGCCAAGCTTCCGGCAGCTTGCTAGAGGG |                     |
| pGL3-RIP2-P2-F | CGTGCTAGCCCGGGCTCGAGTTGTGCCTTCAGTCGCATGCC  | 927                 |
| pGL3-RIP2-P2-R | AACAGTACCGGAATGCCAAGCTTCCGGCAGCTTGCTAGAGGG |                     |
| pGL3-RIP2-P3-F | CGTGCTAGCCCGGGCTCGAGGAACAGGCTGCCCAGAGAAGC  | 1390                |
| pGL3-RIP2-P3-R | AACAGTACCGGAATGCCAAGCTTCCGGCAGCTTGCTAGAGGG |                     |
| pGL3-RIP2-P4-F | CGTGCTAGCCCGGGCTCGAGACAGTGCTACTGTCAGGAGTC  | 1840                |
| pGL3-RIP2-P4-R | AACAGTACCGGAATGCCAAGCTTCCGGCAGCTTGCTAGAGGG |                     |
| pGL3-RIP2-P5-F | CGTGCTAGCCCGGGCTCGAGGGGGCACTGGAGATTCATGAT  | 2301                |
| pGL3-RIP2-P5-R | AACAGTACCGGAATGCCAAGCTTCCGGCAGCTTGCTAGAGGG |                     |
| pGL3-RIP2-P6-F | CGTGCTAGCCCGGGCTCGAGGGTCTGGAGCCCCCAGTACAA  | 2751                |
| pGL3-RIP2-P6-R | AACAGTACCGGAATGCCAAGCTTCCGGCAGCTTGCTAGAGGG |                     |
| pGL3-RIP2-P7-F | CGTGCTAGCCCGGGCTCGAGTGATAAACCACTGAAACTAA   | 3201                |
| pGL3-RIP2-P7-R | AACAGTACCGGAATGCCAAGCTTCCGGCAGCTTGCTAGAGGG |                     |

The underline is enzyme digestion site. *Xho*I recognize sequence CTCGAG; *Hind*III recognize sequence AAGCT
