# Supplementary material for: Transcriptional Regulation of RIP2 Gene by NFIB Is Associated with Cellular Immune and Inflammatory Response to APEC Infection
Source: MDPI journal article supplement (doi:10.3390/ijms23073814), 2022-03-30
Supplement: s1 [file s1]

Table S1. The detailed information of the used datasets for selecting the common transcriptomic response upon APEC infection in different immune tissues

| Accession number | Title                                                                                                                                             | Platform                                                    |
|------------------|---------------------------------------------------------------------------------------------------------------------------------------------------|-------------------------------------------------------------|
| GSE67302         | Avian pathogenic Escherichia coli (APEC) infection alters bone marrow transcriptome in chickens                                                   | GPL16133 Illumina HiSeq 2000 (Gallus gallus)                |
| GSE69014         | Thymus transcriptome reveals novel pathways in response to avian pathogenic Escherichia coli infection                                            | GPL16133 Illumina HiSeq 2000 (Gallus gallus)                |
| GSE70334         | Novel Pathways Revealed in Bursa of Fabricius Transcriptome in Response to Extraintestinal Pathogenic Escherichia coli (ExPEC) Infection          | GPL16133 Illumina HiSeq 2000 (Gallus gallus)                |
| GSE31387         | Transcriptome Response of Leukocytes from Chickens Infected with Avian Pathogenic Escherichia coli Identifies Pathways Associated with Resistance | GPL6413 Chicken 44K custom Agilent microarray (2nd version) |
| GSE25511         | Spleen transcriptome response to infection with avian pathogenic Escherichia coli in broiler chickens                                             | GPL6413 Chicken 44K custom Agilent microarray (2nd version) |
