# Supplementary material for: Transcriptional Regulation of RIP2 Gene by NFIB Is Associated with Cellular Immune and Inflammatory Response to APEC Infection
Source: MDPI journal article supplement (doi:10.3390/ijms23073814), 2022-03-30
Supplement: s1 [file s1]

Table S2. Primers for RT-qPCR

| Gene                  | Genbank accession No. |           | Sequence (5'-3')       | Tm value | Product length (bp) |
|-----------------------|-----------------------|-----------|------------------------|----------|---------------------|
| GAPDH                 | NM_204305.1           | sense     | GTCGGAGTCAACGGATTTGG   | 60.1     | 177                 |
|                       |                       | antisense | GTTCTCAGCCTTGACAGTGCC  | 59.6     |                     |
| RIP2                  | NM_001030943.1        | sense     | CTCGAACCAGTCCTGAGAACG  | 59.7     | 175                 |
|                       |                       | antisense | AAGCGGATGTTTCCTCTTGG   | 59.3     |                     |
| NFIB                  | NM_205272.2           | sense     | AGCATCACCACCCAGGAATC   | 59.3     | 207                 |
|                       |                       | antisense | TGGACGGGTCGTAAGAAGGTA  | 59.7     |                     |
| IL1 $\beta$           | NM_204524.1           | sense     | GTGGCCATGACCAAACTGCT   | 60.5     | 162                 |
|                       |                       | antisense | GAAGGACTGTGAGCGGGTGT   | 59.6     |                     |
| IL6                   | NM_204628.1           | sense     | GAGGAGAAATGCCTGACGAAG  | 59       | 187                 |
|                       |                       | antisense | CCGAGTCTGGGATGACCACT   | 59.3     |                     |
| IL8                   | NM_205018.1           | sense     | ATTCAAAATGTGAACCTCACCC | 58.2     | 152                 |
|                       |                       | antisense | TTGGTGTCTGCCTTGTCAG    | 58.9     |                     |
| p65                   | NM_205129.1           | sense     | CAGCCCATCTATGACAACCG   | 60.1     | 152                 |
|                       |                       | antisense | TCAGCCCAGAAACGAACCTC   | 59.6     |                     |
| I $\kappa$ B $\alpha$ | NM_001001472          | sense     | CACTTGGCCGTAGACCTTCA   | 58.6     | 145                 |
|                       |                       | antisense | TCAGCTGCTCCTGTATGCTG   | 59.2     |                     |
