# Supplementary material for: Transcriptional Regulation of RIP2 Gene by NFIB Is Associated with Cellular Immune and Inflammatory Response to APEC Infection
Source: MDPI journal article supplement (doi:10.3390/ijms23073814), 2022-03-30
Supplement: s1 [file s1]

Table S6. The primer for CHIP-PCR experiment

| Gene        |           | Sequence (5'-3')       | Tm value | CG%  | Product length (bp) |
|-------------|-----------|------------------------|----------|------|---------------------|
| <i>RIP2</i> | sense     | TTCTGTGATGAGGCTGTGAACC | 59.9     | 50   | 196                 |
|             | antisense | GTGATGTGGCATAAGCTGCAG  | 59.1     | 52.4 |                     |
