# Supplementary material for: Transcriptional Regulation of RIP2 Gene by NFIB Is Associated with Cellular Immune and Inflammatory Response to APEC Infection
Source: MDPI journal article supplement (doi:10.3390/ijms23073814), 2022-03-30
Supplement: s1 [file s1]

Table S4. siRNA information for NFIB

| Name      | Target sequence     |
|-----------|---------------------|
| Si-NFIB-1 | GGAGCAAGATTCTGGACAA |
| Si-NFIB-2 | GCACAGAGTGTCATCTCAA |
| Si-NFIB-3 | CCCAAGGAACTGGAGTGAA |
