# Supplementary material for: Transcriptional Regulation of RIP2 Gene by NFIB Is Associated with Cellular Immune and Inflammatory Response to APEC Infection
Source: MDPI journal article supplement (doi:10.3390/ijms23073814), 2022-03-30
Supplement: s1 [file s1]

Table S5. shRNA information for *RIP2*

| ID       | 5'          | stem                      | loop      | stem                      | 3'      |
|----------|-------------|---------------------------|-----------|---------------------------|---------|
| NC-F     | GATCC       | GACGAAAGTCAAGACTTCTATTCAA | TTCAAGAGA | TTGAATAGAAGTCTTGACTTTCGTC | TTTTTTG |
| NC-R     | AATTCAAAAAA | GACGAAAGTCAAGACTTCTATTCAA | TCTCTTGAA | TTGAATAGAAGTCTTGACTTTCGTC | G       |
| shRNA1-F | GATCC       | ACAGTGATAGAAACCACCTTCTAAA | TTCAAGAGA | TTTAGAAGGTGGTTTCTATCACTGT | TTTTTTG |
| shRNA1-R | AATTCAAAAAA | ACAGTGATAGAAACCACCTTCTAAA | TCTCTTGAA | TTTAGAAGGTGGTTTCTATCACTGT | G       |
| shRNA2-F | GATCC       | GACTTAAGTGAAACCAGCTTATCAA | TTCAAGAGA | TTGATAAGCTGGTTTCACTTAAGTC | TTTTTTG |
| shRNA2-R | AATTCAAAAAA | GACTTAAGTGAAACCAGCTTATCAA | TCTCTTGAA | TTGATAAGCTGGTTTCACTTAAGTC | G       |
| shRNA3-F | GATCC       | ACAAACAGCTAGGACTTCAACCTTA | TTCAAGAGA | TAAGGTTGAAGTCCTAGCTGTTTGT | TTTTTTG |
| shRNA3-R | AATTCAAAAAA | ACAAACAGCTAGGACTTCAACCTTA | TCTCTTGAA | TAAGGTTGAAGTCCTAGCTGTTTGT | G       |
